# Supplementary material for: Droplet microfluidics based combinatorial indexing for massive-scale 5′-end single-cell RNA sequencing
Source: Research Square preprint supplement (doi:10.21203/rs.3.rs-1510072/v1), 2022-05-10
Supplement: Supplementary file 1 [file 9113e475025c7efba0a79827.xlsx]

## Sheet: Fipresci-Seq oligos
Oligo_Name	Usage	Sequence [5'>3']	Purification	Note
TN5_A_ME	Indexed Tn5 Transposome assembly	[5Phos]CTGTCTCTTATACACATCT/3ddC/	HPLC	[5Phos]: 5' phosphorylation; [ddC]:Dideoxy-C, to block 3' extension by polymerases
TN5_R2_index	Indexed Tn5 Transposome assembly	GACGTGTGCTCTTCCGATCT[NNNNNN]AGATGTGTATAAGAGACAG	HPLC	Full sequence and index are listed in next sheet: 96 i7-Tn5
RT PolyT Primer（NEB #S1327S）	Reverse Transcription	d(T)23VN	HPLC	N:Any base; V: Not T
RT random Primer（Thermo Scientific # SO142）	Reverse Transcription	d(NNNNNN)，N = G, A, T or C	HPLC
S5R-P5		AATGATACGGCGACCACCGA-GATCTACACTCTTTCCCTACACGACGCTC	HPLC
S5R-P5-bio		[5Bio]AATGATACGGCGACCACCGA-GATCTACACTCTTTCCCTACACGACGCTC	HPLC	[5Bio]:5'biotin
S-P7		CAAGCAGAAGACGGCATACGAGAT[NNNNNN]GTGACTGGAGTTCAGACGTGTGCTCTTCCGATC-s-T	HPLC
S-P7-index1		CAAGCAGAAGACGGCATACGAGATCGTGATGTGACTGGAGTTCAGACGTGTGCTCTTCCGATC-s-T	HPLC
S-P7-index2		CAAGCAGAAGACGGCATACGAGATACATCGGTGACTGGAGTTCAGACGTGTGCTCTTCCGATC-s-T	HPLC
S-P7-index3		CAAGCAGAAGACGGCATACGAGATGCCTAAGTGACTGGAGTTCAGACGTGTGCTCTTCCGATC-s-T	HPLC
S-P7-index4		CAAGCAGAAGACGGCATACGAGATTGGTCAGTGACTGGAGTTCAGACGTGTGCTCTTCCGATC-s-T	HPLC
S-P7-index5		CAAGCAGAAGACGGCATACGAGATCACTGTGTGACTGGAGTTCAGACGTGTGCTCTTCCGATC-s-T	HPLC
S-P7-index6		CAAGCAGAAGACGGCATACGAGATATTGGCGTGACTGGAGTTCAGACGTGTGCTCTTCCGATC-s-T	HPLC
S-P7-index7		CAAGCAGAAGACGGCATACGAGATGATCTGGTGACTGGAGTTCAGACGTGTGCTCTTCCGATC-s-T	HPLC
S-P7-index8		CAAGCAGAAGACGGCATACGAGATTCAAGTGTGACTGGAGTTCAGACGTGTGCTCTTCCGATC-s-T	HPLC
S-P7-index9		CAAGCAGAAGACGGCATACGAGATCTGATCGTGACTGGAGTTCAGACGTGTGCTCTTCCGATC-s-T	HPLC
S-P7-index10		CAAGCAGAAGACGGCATACGAGATAAGCTAGTGACTGGAGTTCAGACGTGTGCTCTTCCGATC-s-T	HPLC
S-P7-index11		CAAGCAGAAGACGGCATACGAGATGTAGCCGTGACTGGAGTTCAGACGTGTGCTCTTCCGATC-s-T	HPLC
S-P7-index12		CAAGCAGAAGACGGCATACGAGATTACAAGGTGACTGGAGTTCAGACGTGTGCTCTTCCGATC-s-T	HPLC
Human TCR outer-1		TGAAGGCGTTTGCACATGCA	HPLC
Human TCR outer-2		TCAGGCAGTATCTGGAGTCATTGAG	HPLC
Humane TCR inner-1		CTGGTTGCTCCAGGCAATGG	HPLC
Human TCR inner-2		TGTAGGCCTGAGGGTCCGT	HPLC

## Sheet: 96 i7-Tn5
TN5_B_index (modified to contain barcode):
Nextera Read 1	Barcode	ME
GACGTGTGCTCTTCCGATCT	NNNNNN	AGATGTGTATAAGAGACAG
Full sequence:
Oligo	round 1 Barcode	Full sequence
n-Tn5-bo_i7-index1	AAAGAA	GACGTGTGCTCTTCCGATCTAAAGAAAGATGTGTATAAGAGACAG
n-Tn5-bo_i7-index2	AACAGC	GACGTGTGCTCTTCCGATCTAACAGCAGATGTGTATAAGAGACAG
n-Tn5-bo_i7-index3	AACGTG	GACGTGTGCTCTTCCGATCTAACGTGAGATGTGTATAAGAGACAG
n-Tn5-bo_i7-index4	AAGCCA	GACGTGTGCTCTTCCGATCTAAGCCAAGATGTGTATAAGAGACAG
n-Tn5-bo_i7-index5	AAGTAT	GACGTGTGCTCTTCCGATCTAAGTATAGATGTGTATAAGAGACAG
n-Tn5-bo_i7-index6	AATTGG	GACGTGTGCTCTTCCGATCTAATTGGAGATGTGTATAAGAGACAG
n-Tn5-bo_i7-index7	ACAAGG	GACGTGTGCTCTTCCGATCTACAAGGAGATGTGTATAAGAGACAG
n-Tn5-bo_i7-index8	ACCCAA	GACGTGTGCTCTTCCGATCTACCCAAAGATGTGTATAAGAGACAG
n-Tn5-bo_i7-index9	ACCTTC	GACGTGTGCTCTTCCGATCTACCTTCAGATGTGTATAAGAGACAG
n-Tn5-bo_i7-index10	ACGGAC	GACGTGTGCTCTTCCGATCTACGGACAGATGTGTATAAGAGACAG
n-Tn5-bo_i7-index11	ACTGCA	GACGTGTGCTCTTCCGATCTACTGCAAGATGTGTATAAGAGACAG
n-Tn5-bo_i7-index12	AGACCC	GACGTGTGCTCTTCCGATCTAGACCCAGATGTGTATAAGAGACAG
n-Tn5-bo_i7-index13	AGATGT	GACGTGTGCTCTTCCGATCTAGATGTAGATGTGTATAAGAGACAG
n-Tn5-bo_i7-index14	AGCACG	GACGTGTGCTCTTCCGATCTAGCACGAGATGTGTATAAGAGACAG
n-Tn5-bo_i7-index15	AGGTTA	GACGTGTGCTCTTCCGATCTAGGTTAAGATGTGTATAAGAGACAG
n-Tn5-bo_i7-index16	AGTAAA	GACGTGTGCTCTTCCGATCTAGTAAAAGATGTGTATAAGAGACAG
n-Tn5-bo_i7-index17	AGTCTG	GACGTGTGCTCTTCCGATCTAGTCTGAGATGTGTATAAGAGACAG
n-Tn5-bo_i7-index18	ATACTT	GACGTGTGCTCTTCCGATCTATACTTAGATGTGTATAAGAGACAG
n-Tn5-bo_i7-index19	ATAGCG	GACGTGTGCTCTTCCGATCTATAGCGAGATGTGTATAAGAGACAG
n-Tn5-bo_i7-index20	ATATAC	GACGTGTGCTCTTCCGATCTATATACAGATGTGTATAAGAGACAG
n-Tn5-bo_i7-index21	ATCCGG	GACGTGTGCTCTTCCGATCTATCCGGAGATGTGTATAAGAGACAG
n-Tn5-bo_i7-index22	ATGAAG	GACGTGTGCTCTTCCGATCTATGAAGAGATGTGTATAAGAGACAG
n-Tn5-bo_i7-index23	ATTAGT	GACGTGTGCTCTTCCGATCTATTAGTAGATGTGTATAAGAGACAG
n-Tn5-bo_i7-index24	CAACCG	GACGTGTGCTCTTCCGATCTCAACCGAGATGTGTATAAGAGACAG
n-Tn5-bo_i7-index25	CAAGTC	GACGTGTGCTCTTCCGATCTCAAGTCAGATGTGTATAAGAGACAG
n-Tn5-bo_i7-index26	CACCAC	GACGTGTGCTCTTCCGATCTCACCACAGATGTGTATAAGAGACAG
n-Tn5-bo_i7-index27	CACTGT	GACGTGTGCTCTTCCGATCTCACTGTAGATGTGTATAAGAGACAG
n-Tn5-bo_i7-index28	CAGACT	GACGTGTGCTCTTCCGATCTCAGACTAGATGTGTATAAGAGACAG
n-Tn5-bo_i7-index29	CAGGAG	GACGTGTGCTCTTCCGATCTCAGGAGAGATGTGTATAAGAGACAG
n-Tn5-bo_i7-index30	CATAGA	GACGTGTGCTCTTCCGATCTCATAGAAGATGTGTATAAGAGACAG
n-Tn5-bo_i7-index31	CCACGC	GACGTGTGCTCTTCCGATCTCCACGCAGATGTGTATAAGAGACAG
n-Tn5-bo_i7-index32	CCGATG	GACGTGTGCTCTTCCGATCTCCGATGAGATGTGTATAAGAGACAG
n-Tn5-bo_i7-index33	CCGTAA	GACGTGTGCTCTTCCGATCTCCGTAAAGATGTGTATAAGAGACAG
n-Tn5-bo_i7-index34	CCTCTA	GACGTGTGCTCTTCCGATCTCCTCTAAGATGTGTATAAGAGACAG
n-Tn5-bo_i7-index35	CGAAAG	GACGTGTGCTCTTCCGATCTCGAAAGAGATGTGTATAAGAGACAG
n-Tn5-bo_i7-index36	CGAGCA	GACGTGTGCTCTTCCGATCTCGAGCAAGATGTGTATAAGAGACAG
n-Tn5-bo_i7-index37	CGCATA	GACGTGTGCTCTTCCGATCTCGCATAAGATGTGTATAAGAGACAG
n-Tn5-bo_i7-index38	CGGCGT	GACGTGTGCTCTTCCGATCTCGGCGTAGATGTGTATAAGAGACAG
n-Tn5-bo_i7-index39	CGGTCC	GACGTGTGCTCTTCCGATCTCGGTCCAGATGTGTATAAGAGACAG
n-Tn5-bo_i7-index40	CGTTAT	GACGTGTGCTCTTCCGATCTCGTTATAGATGTGTATAAGAGACAG
n-Tn5-bo_i7-index41	CTAGGT	GACGTGTGCTCTTCCGATCTCTAGGTAGATGTGTATAAGAGACAG
n-Tn5-bo_i7-index42	CTATTA	GACGTGTGCTCTTCCGATCTCTATTAAGATGTGTATAAGAGACAG
n-Tn5-bo_i7-index43	CTCAAT	GACGTGTGCTCTTCCGATCTCTCAATAGATGTGTATAAGAGACAG
n-Tn5-bo_i7-index44	CTGTGG	GACGTGTGCTCTTCCGATCTCTGTGGAGATGTGTATAAGAGACAG
n-Tn5-bo_i7-index45	CTTACG	GACGTGTGCTCTTCCGATCTCTTACGAGATGTGTATAAGAGACAG
n-Tn5-bo_i7-index46	CTTGAA	GACGTGTGCTCTTCCGATCTCTTGAAAGATGTGTATAAGAGACAG
n-Tn5-bo_i7-index47	GAAATA	GACGTGTGCTCTTCCGATCTGAAATAAGATGTGTATAAGAGACAG
n-Tn5-bo_i7-index48	GAAGGG	GACGTGTGCTCTTCCGATCTGAAGGGAGATGTGTATAAGAGACAG
n-Tn5-bo_i7-index49	GACTCG	GACGTGTGCTCTTCCGATCTGACTCGAGATGTGTATAAGAGACAG
n-Tn5-bo_i7-index50	GAGCTT	GACGTGTGCTCTTCCGATCTGAGCTTAGATGTGTATAAGAGACAG
n-Tn5-bo_i7-index51	GAGGCC	GACGTGTGCTCTTCCGATCTGAGGCCAGATGTGTATAAGAGACAG
n-Tn5-bo_i7-index52	GAGTGA	GACGTGTGCTCTTCCGATCTGAGTGAAGATGTGTATAAGAGACAG
n-Tn5-bo_i7-index53	GATCAA	GACGTGTGCTCTTCCGATCTGATCAAAGATGTGTATAAGAGACAG
n-Tn5-bo_i7-index54	GCCAGA	GACGTGTGCTCTTCCGATCTGCCAGAAGATGTGTATAAGAGACAG
n-Tn5-bo_i7-index55	GCCGTT	GACGTGTGCTCTTCCGATCTGCCGTTAGATGTGTATAAGAGACAG
n-Tn5-bo_i7-index56	GCGAAT	GACGTGTGCTCTTCCGATCTGCGAATAGATGTGTATAAGAGACAG
n-Tn5-bo_i7-index57	GCGCGG	GACGTGTGCTCTTCCGATCTGCGCGGAGATGTGTATAAGAGACAG
n-Tn5-bo_i7-index58	GCTCCC	GACGTGTGCTCTTCCGATCTGCTCCCAGATGTGTATAAGAGACAG
n-Tn5-bo_i7-index59	GCTGAG	GACGTGTGCTCTTCCGATCTGCTGAGAGATGTGTATAAGAGACAG
n-Tn5-bo_i7-index60	GCTTGT	GACGTGTGCTCTTCCGATCTGCTTGTAGATGTGTATAAGAGACAG
n-Tn5-bo_i7-index61	GGACGA	GACGTGTGCTCTTCCGATCTGGACGAAGATGTGTATAAGAGACAG
n-Tn5-bo_i7-index62	GGATTG	GACGTGTGCTCTTCCGATCTGGATTGAGATGTGTATAAGAGACAG
n-Tn5-bo_i7-index63	GGCCAT	GACGTGTGCTCTTCCGATCTGGCCATAGATGTGTATAAGAGACAG
n-Tn5-bo_i7-index64	GGGATC	GACGTGTGCTCTTCCGATCTGGGATCAGATGTGTATAAGAGACAG
n-Tn5-bo_i7-index65	GGTAGG	GACGTGTGCTCTTCCGATCTGGTAGGAGATGTGTATAAGAGACAG
n-Tn5-bo_i7-index66	GGTGCT	GACGTGTGCTCTTCCGATCTGGTGCTAGATGTGTATAAGAGACAG
n-Tn5-bo_i7-index67	GTACAG	GACGTGTGCTCTTCCGATCTGTACAGAGATGTGTATAAGAGACAG
n-Tn5-bo_i7-index68	GTCCTA	GACGTGTGCTCTTCCGATCTGTCCTAAGATGTGTATAAGAGACAG
n-Tn5-bo_i7-index69	GTCGGC	GACGTGTGCTCTTCCGATCTGTCGGCAGATGTGTATAAGAGACAG
n-Tn5-bo_i7-index70	GTGGTG	GACGTGTGCTCTTCCGATCTGTGGTGAGATGTGTATAAGAGACAG
n-Tn5-bo_i7-index71	GTTAAC	GACGTGTGCTCTTCCGATCTGTTAACAGATGTGTATAAGAGACAG
n-Tn5-bo_i7-index72	GTTTCA	GACGTGTGCTCTTCCGATCTGTTTCAAGATGTGTATAAGAGACAG
n-Tn5-bo_i7-index73	TAAGCT	GACGTGTGCTCTTCCGATCTTAAGCTAGATGTGTATAAGAGACAG
n-Tn5-bo_i7-index74	TAATAG	GACGTGTGCTCTTCCGATCTTAATAGAGATGTGTATAAGAGACAG
n-Tn5-bo_i7-index75	TACCGA	GACGTGTGCTCTTCCGATCTTACCGAAGATGTGTATAAGAGACAG
n-Tn5-bo_i7-index76	TAGAGG	GACGTGTGCTCTTCCGATCTTAGAGGAGATGTGTATAAGAGACAG
n-Tn5-bo_i7-index77	TATTTC	GACGTGTGCTCTTCCGATCTTATTTCAGATGTGTATAAGAGACAG
n-Tn5-bo_i7-index78	TCAGTG	GACGTGTGCTCTTCCGATCTTCAGTGAGATGTGTATAAGAGACAG
n-Tn5-bo_i7-index79	TCATCA	GACGTGTGCTCTTCCGATCTTCATCAAGATGTGTATAAGAGACAG
n-Tn5-bo_i7-index80	TCCAAG	GACGTGTGCTCTTCCGATCTTCCAAGAGATGTGTATAAGAGACAG
n-Tn5-bo_i7-index81	TCGCCT	GACGTGTGCTCTTCCGATCTTCGCCTAGATGTGTATAAGAGACAG
n-Tn5-bo_i7-index82	TCGGGA	GACGTGTGCTCTTCCGATCTTCGGGAAGATGTGTATAAGAGACAG
n-Tn5-bo_i7-index83	TCTAGC	GACGTGTGCTCTTCCGATCTTCTAGCAGATGTGTATAAGAGACAG
n-Tn5-bo_i7-index84	TGAATT	GACGTGTGCTCTTCCGATCTTGAATTAGATGTGTATAAGAGACAG
n-Tn5-bo_i7-index85	TGAGAC	GACGTGTGCTCTTCCGATCTTGAGACAGATGTGTATAAGAGACAG
n-Tn5-bo_i7-index86	TGCGGT	GACGTGTGCTCTTCCGATCTTGCGGTAGATGTGTATAAGAGACAG
n-Tn5-bo_i7-index87	TGCTAA	GACGTGTGCTCTTCCGATCTTGCTAAAGATGTGTATAAGAGACAG
n-Tn5-bo_i7-index88	TGGCAG	GACGTGTGCTCTTCCGATCTTGGCAGAGATGTGTATAAGAGACAG
n-Tn5-bo_i7-index89	TGTGTA	GACGTGTGCTCTTCCGATCTTGTGTAAGATGTGTATAAGAGACAG
n-Tn5-bo_i7-index90	TGTTCG	GACGTGTGCTCTTCCGATCTTGTTCGAGATGTGTATAAGAGACAG
n-Tn5-bo_i7-index91	TTAAGA	GACGTGTGCTCTTCCGATCTTTAAGAAGATGTGTATAAGAGACAG
n-Tn5-bo_i7-index92	TTCGCA	GACGTGTGCTCTTCCGATCTTTCGCAAGATGTGTATAAGAGACAG
n-Tn5-bo_i7-index93	TTCTTG	GACGTGTGCTCTTCCGATCTTTCTTGAGATGTGTATAAGAGACAG
n-Tn5-bo_i7-index94	TTGCTC	GACGTGTGCTCTTCCGATCTTTGCTCAGATGTGTATAAGAGACAG
n-Tn5-bo_i7-index95	TTGGAT	GACGTGTGCTCTTCCGATCTTTGGATAGATGTGTATAAGAGACAG
n-Tn5-bo_i7-index96	TTTGGG	GACGTGTGCTCTTCCGATCTTTTGGGAGATGTGTATAAGAGACAG
